1 **Title**

2 Historical climate change and megafaunal extinctions linked to genetic diversity declines in  
3 shorebirds.

4

5 **Author names and affiliations**

6 Hui Zhen Tan<sup>1</sup>, Justin J.F.J. Jansen<sup>2</sup>, Gary A. Allport<sup>3</sup>, Kritika M. Garg<sup>1,4</sup>, Balaji  
7 Chattopadhyay<sup>1,5</sup>, Martin Irestedt<sup>6</sup>, Glen Chilton<sup>7</sup>, Chyi Yin Gwee<sup>1,8</sup>, and Frank E. Rheindt<sup>1\*</sup>

8

9 <sup>1</sup>Department of Biological Sciences, National University of Singapore, 16 Science Drive 4,  
10 Singapore 117558, Singapore

11 <sup>2</sup>Naturalis Biodiversity Center, Leiden, P.O. Box 9517, 2300 RA Leiden, The Netherlands

12 <sup>3</sup>BirdLife International, The David Attenborough Building, Pembroke Street, Cambridge, UK  
13 CB2 3QZ

14 <sup>4</sup>(Present address) Department of Biology, Ashoka University, Sonipat 131029, India

15 <sup>5</sup>(Present address) Trivedi School of Biosciences, Ashoka University, Sonipat 131029, India

16 <sup>6</sup>Department of Bioinformatics and Genetics, Swedish Museum of Natural History, Stockholm,  
17 Sweden

18 <sup>7</sup>Department of Biology, St. Mary's University, Calgary, Alberta, Canada.

19 <sup>8</sup>(Present address) Division of Evolutionary Biology, Faculty of Biology, LMU Munich, Munich,  
20 Germany

21

22 \*Corresponding Author; e-mail: [dbsrfe@nus.edu.sg](mailto:dbsrfe@nus.edu.sg)

23

24 **Abstract**

25           The impact of accelerated climate change on extinction risk is not well-characterised  
26 despite its increasing relevance. Comparative genomics of extinct versus extant species might be  
27 useful in elucidating broad trends in faunal endangerment. We investigated fluctuations in  
28 genetic diversity and extinction timing in our genomic dataset of nine species of particularly  
29 vulnerable migratory shorebirds (*Numenius*), including two species widely thought to be extinct.  
30 Most species faced generally sharp declines in effective population sizes, a proxy for genetic  
31 diversity, soon after the Last Glacial Maximum. During this time, a warming climate supported  
32 forest expansions at the expense of open habitats, exacerbated by human-induced mass  
33 extinctions of megafauna only a few thousand years prior, resulting in unprecedented reductions  
34 in shorebird breeding habitat. Species breeding in temperate regions, where they widely overlap  
35 with human populations, have been most strongly affected. Late Quaternary events can exert  
36 long-lasting effects on some species' susceptibility to extinction. Genomic inquiry is crucial in  
37 informing conservation actions in the fight against ongoing biodiversity loss.

38

## 39 **Introduction**

40 Extinction is a natural and ongoing phenomenon, mostly occurring at low rates (Turvey &  
41 Crees, 2019). Occasionally, extreme events such as climate change lead to mass species  
42 extinctions and major biotic turnover (Crowley & North, 1988). Today, accelerating climate  
43 change is increasingly apparent, coinciding with elevated rates of species extinction that are 100–  
44 1000 times higher than the background rate (Koch & Barnosky, 2006; Pimm et al., 2014). While  
45 anthropogenic climate change is recognised as a major threat to biodiversity worldwide, the  
46 mechanisms by which it causes extinction, be it physiological stress, species interactions or other  
47 proximate causes, are not well characterised (Cahill et al., 2013). Investigations into the impact  
48 of anthropogenic climate change on species extinction risk are of paramount importance to  
49 inform conservation action in the fight against ongoing biodiversity loss (Frankham, 2005; Jetz  
50 et al., 2014; Urban, 2015).

51 The endangerment process and its associated conservation actions are usually viewed  
52 through a species-specific lens to pinpoint traits explaining a taxon's susceptibility to extinction.  
53 However, a universal approach based on genomic correlates of larger panels of species could add  
54 an important perspective to elucidate trends in faunal endangerment. Comparative genomics of  
55 extinct versus extant species are particularly useful in this context (Frankham, 2005), but have  
56 proven challenging in the past because of difficulties in obtaining viable genomic DNA from  
57 extinct taxa. Such comparisons can provide insights into past population trends to shed light on  
58 extinction risk in extant species.

59 We used a museomic approach to investigate fluctuations in genetic diversity in a genus of  
60 nine species of migratory shorebirds. Migratory shorebirds are threatened by warming  
61 temperatures and habitat loss in their breeding and wintering grounds respectively (Lemoine &

62 Böhning-Gaese, 2003). Curlews and whimbrels of the genus *Numenius*, which breed across the  
63 world's tundras and temperate grasslands, are particularly vulnerable to endangerment due to  
64 comparatively long generation times (Pearce-Higgins et al., 2017). Our study includes two  
65 species, the slender-billed curlew (*N. tenuirostris*) and Eskimo curlew (*N. borealis*), that are  
66 presumably extinct (Buchanan et al., 2018; Butchart et al., 2018; Kirwan, Porter, & Scott, 2015;  
67 Pearce-Higgins et al., 2017; Roberts, Elphick, & Reed, 2010; Roberts & Jarić, 2016). We  
68 acquired 67 ancient and fresh samples from all nine *Numenius* species and most known  
69 subspecies (Figure 1A; Table S1) for target enrichment. After filtering, a final alignment of  
70 514,771bp across 524 sequence loci were retained for each of 62 samples at a mean coverage of  
71 118X.

## 72 **Results and discussion**

73 Phylogenomic analyses using MP-EST (L. Liu, Yu, & Edwards, 2010) revealed two separate  
74 groups, here called the “whimbrel clade” and the “curlew clade”, that diverged approximately 5  
75 million years ago (Figure 1B; Figure S1A). This is the first phylogenomic analysis consisting of  
76 all members of the genus *Numenius*. The use of degraded DNA from toepads of museum  
77 specimens allowed us to include the two presumably extinct taxa. Of these, the slender-billed  
78 curlew emerged as sister to the Eurasian curlew (*N. arquata*), a phenotypically similar species  
79 with which it overlapped in its Central Asian breeding range (Sharko et al., 2019). On the other  
80 hand, the Eskimo curlew emerged as a distinct member of the curlew clade with no close  
81 relatives (Figure 1B). Our phylogenomic dating analyses demonstrated that 40.6% of the  
82 evolutionary distinctness (Jetz et al., 2014) of the curlew clade has been lost with the presumable  
83 extinction of the two species, and another 15% is endangered (Figure 1B; Table S2), rendering  
84 this one of the most extinction-prone bird groups globally.

85 To further characterise the differential impact of extinction pressures, we characterised the  
86 demographic history of each species and considered them in the context of key climatic and  
87 biotic events. Reconstruction of fluctuations in effective population size ( $N_e$ ), a proxy for genetic  
88 diversity, using stairway plot (X. Liu & Fu, 2015) revealed generally sharp declines in most  
89 species that accelerated ~11,000 years ago (kya) and continued to the present day for some  
90 species (Figure 1C). Preceding the onset of this decline (50–10kya), cooling events leading up to  
91 the LGM allowed tundra habitats to dominate and saw great increases in  $N_e$  in the tundra-  
92 inhabiting Eurasian whimbrel (*N. phaeopus*) (Binney et al., 2017; Zimov et al., 1995). At the  
93 same time, widespread megafaunal extinction was underway due to both climate change and the  
94 arrival of early *Homo sapiens* that carried out hunts (Figure 1C) (Koch & Barnosky, 2006).  
95 Without functional replacements for the ecosystem-engineering effects of grazing megafauna,  
96 temperate grasslands and steppes were not maintained (Bakker et al., 2016). With the end of the  
97 last glacial period and the onset of a warming interglacial climate, forests expanded at the  
98 expense of open habitats (Binney et al., 2017). This displacement lowered the carrying capacity  
99 for megafauna and led to further population declines, forming a feedback loop (Koch &  
100 Barnosky, 2006). Therefore, post-glacial warming and megafaunal extinction may have acted  
101 synergistically in producing unprecedented reductions of open landscapes for breeding and  
102 concomitant sharp declines in the genetic diversity of *Numenius* shorebirds.

103 In the late Holocene, climate regimes have been relatively stable compared to that of the last  
104 glacial period (Dansgaard et al., 1993). However, members of the curlew clade, which  
105 predominantly breed in temperate grasslands and steppes, persistently exhibit levels of  $N_e$  that  
106 are an order of magnitude lower than those of the tundra-inhabiting whimbrels (Figure 1C). After  
107 declines in  $N_e$  in the post-glacial Holocene, whimbrels seem to have stabilised in genetic

108 diversity starting at ~700 years ago while curlews have continued to decline. The fates of these  
109 two *Numenius* clades appear to have diverged at the onset of post-glacial warming. Whimbrels  
110 accumulated and maintained genetic diversity during glacial periods when ice-free tundra  
111 habitats in Far Eastern Siberia and Alaska were expansive (Bigelow et al., 2003; Binney et al.,  
112 2017). In contrast, curlews were forced into smaller temperate glacial refuges and would have  
113 suffered great reductions in genetic diversity, incurring extinction debt (Kuussaari et al., 2009;  
114 Tan et al., 2019; Urban, 2015). Presently, temperate grasslands, where curlews breed, face far  
115 greater anthropogenic pressures through various land use regimes than the northerly tundra  
116 (Pimm et al., 2014), contributing to continued declines of curlews more so than whimbrels. In  
117 particular, genetic diversity was lowest in the presumably extinct slender-billed curlew, *N.*  
118 *tenuirostris* (Figure 1C). A low genetic diversity decreases the evolutionary potential for  
119 adaptations to environmental change and increases susceptibility to inbreeding depression,  
120 raising a species' extinction risk (Frankham, 2005).

121 The plight of these curlews may be mirrored by other species as the world's biodiversity  
122 becomes increasingly threatened, with unknown consequences for ecosystems (Pimm et al.,  
123 2014). Our work emphasises that genomic inquiries into past genetic diversity trends can inform  
124 present-day conservation action by revealing bottleneck events and pinpointing populations with  
125 a depauperate genetic diversity. We also highlight the unique challenges faced by grassland  
126 biomes and biota that warrant more conservation attention (Török, Ambarlı, Kamp, Wesche, &  
127 Dengler, 2016).

128 Our study revealed that climatic and environmental changes impacted the genetic diversity of  
129 curlews, with similar declines documented in other grassland-dependent biota (Ceballos et al.,  
130 2010; Chan, Lacey, Pearson, & Hadly, 2005; Helm et al., 2009; Nakahama, Uchida, Ushimaru,

131 & Isagi, 2018; Wesche et al., 2016). Late Quaternary climate change and megafaunal extinction  
 132 may have had cascading effects onto species' endangerment that have lasted to the present day.  
 133 This work provides a glimpse into how biodiversity may – in the future – respond to unabating  
 134 anthropogenic climate change.

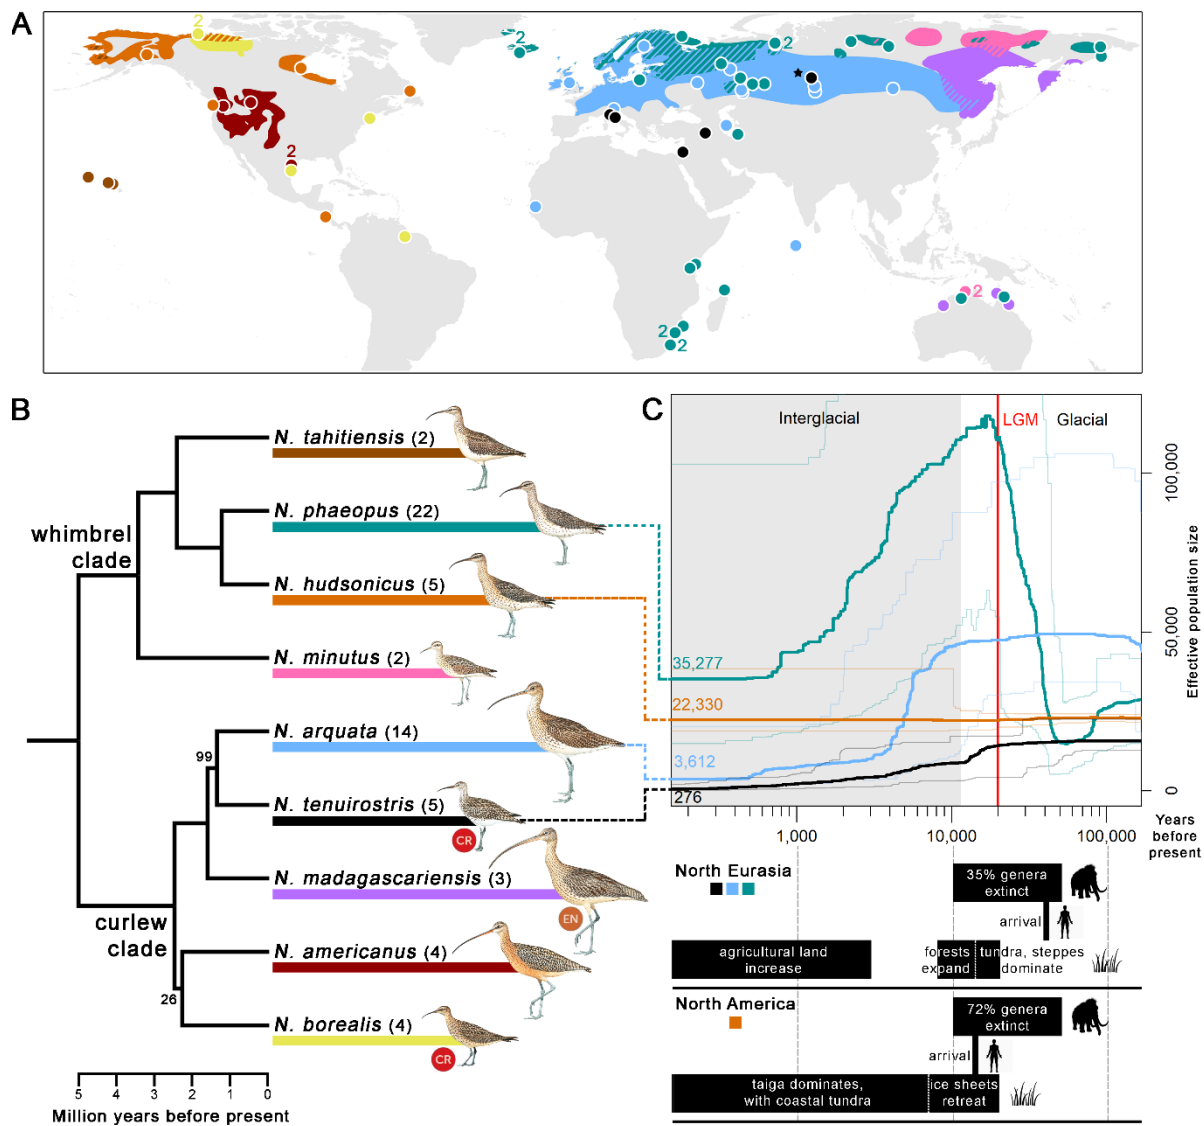

135

136 Figure 1. (A) Breeding distribution map and sampling localities of all *Numerenius* species. Colours correspond to  
 137 species identities in the tree in (B). Diagonal lines denote regions with co-distributed species. Each circle represents  
 138 one sample unless otherwise specified by an adjacent number. The only known breeding records of *N. tenuirostris*  
 139 were from near the village of Krasnoperova c.10 km south of Tara, Omsk (Russia), which is denoted with a black  
 140 star (★), although this might not have been the core breeding area. (B) Phylogenomic tree constructed from an  
 141 alignment of 514,771bp across 524 sequence loci. Tree topology (including bootstrap support values) and

142 divergence times were estimated with MP-EST and MCMCTree respectively. Only bootstrap <100 is displayed.  
143 Sample sizes for each species are given in brackets. IUCN Red List status of critically endangered (CR) and  
144 endangered (EN) species are indicated. Illustrations of *Numenius* birds were reproduced with permission from Lynx  
145 Edicions. (C) Demographic history reconstruction using stairway plot for all species represented by  $\geq 5$  samples,  
146 which is the minimum number of samples required. Line colours correspond to species identities in the tree in (B)  
147 and numbers at present time represent the present-day effective population size. Thick lines represent the median  
148 effective population size while thin lines represent the 2.5 and 97.5 percentile estimation respectively. The grey-  
149 shaded panel indicates the current interglacial period and the red line denotes the Last Glacial Maximum (LGM).  
150 Black bars below the plot provide key dates of megafaunal extinction events(Koch & Barnosky, 2006), *Homo*  
151 *sapiens* arrival(Koch & Barnosky, 2006) and climatic change for northern Eurasia(Binney et al., 2017) and North  
152 America(Bigelow et al., 2003) respectively. The timing of these events is indicated with light grey dashed lines  
153 extending downwards from the time axis.

154

## 155 **Materials and methods**

### 156 Taxon sampling

157 We acquired samples for all nine species in the genus *Numenius*, encompassing most of  
158 the known subspecies. Species and subspecies identities are as provided by the source museum  
159 or institution (Table S1) or assigned in reference to known breeding and wintering locations  
160 (Billerman, Keeney, Rodewald, & Schulenberg, 2020). We also included one common redshank  
161 *Tringa totanus* as an outgroup for phylogenetic rooting. Most samples were acquired through  
162 museum loans except for an individual of the endangered subspecies *N. phaeopus alboaxillaris*  
163 that was sampled during fieldwork by GA (Table S1). Where possible, we acquired fresh  
164 samples (tissue or blood) for their higher quality of genetic information. To represent rarely  
165 sampled or presently rare taxa for which no fresh samples were available, we acquired toepad  
166 material from historic museum specimens and applied ancient DNA methods.

### 167 Baits design for target capture

168 We used the *Calidris pugnax* genome (GCA\_001458055.1) (Küpper et al., 2015) to  
169 design baits to capture selected exons. We used EvolMarkers (C. Li, Riethoven, & Naylor, 2012)  
170 to identify single-copy exons conserved between *C. pugnax*, *Taeniopygia guttata* (accession no.



171 GCF\_003957565.1; released by the Vertebrate Genomes Project) and *Ficedula albicollis*  
172 (accession no. GCA\_000247815.1). Exons longer than 500bp with a minimum identity of 55%  
173 and an e-value  $< 10e^{-15}$  were isolated with bedtools 2.28.0 (Quinlan & Hall, 2010), forming  
174 our target loci. Only target loci with 40–60% GC content were retained and any overlapping loci  
175 were merged (Quinlan & Hall, 2010). Finally, target loci with repeat elements were filtered out  
176 in RepeatMasker 4.0.6 (Smit, Hubley, & Green, 2015). We arrived at a final set of 565 unique  
177 target loci with a mean length of 970bp. These target loci were used to design 19,003 100bp-long  
178 biotinylated RNA baits at 4X tiling density (MYcoarray/Arbor Biosciences, USA).

### 179 Laboratory methods

180 Both fresh and ancient samples were subjected to DNA extraction, followed by library  
181 preparation and target enrichment, with slight modifications for various sample types to optimise  
182 yield. DNA extractions of fresh samples were performed using the DNEasy Blood & Tissue Kit  
183 (Qiagen, Germany) with an additional incubation step with heat-treated RNase. Extractions for  
184 ancient samples were performed using the same kit but with modifications to reagent volumes  
185 and extraction columns (Chattopadhyay, Garg, Mendenhall, & Rheindt, 2019). Ancient samples  
186 were processed in a dedicated facility for highly degraded specimens.

187 DNA extracted from fresh samples was sheared via sonification using Bioruptor Pico  
188 (Diagenode, Belgium) to a target size of 250bp. DNA extracts from ancient samples were  
189 generally smaller than the target size; hence no further shearing was performed. Whole-genome  
190 libraries were prepared using the NEBNext Ultra™ II DNA Library Prep Kit for Illumina (New  
191 England Biolabs, Ipswich, USA) with modifications for subsequent target enrichment. For fresh  
192 samples, adaptor concentrations were kept constant regardless of DNA input amount. Size  
193 selection with AMPure XP beads (Beckman Coulter, USA) was performed for 250bp insert

194 sizes. The reaction was split into two equal parts before polymerase chain reaction (PCR)  
195 amplification and combined afterwards for subsequent steps. For ancient samples, a formalin-  
196 fixed, paraffin-embedded (FFPE) DNA repair step was first performed using NEBNext FFPE  
197 DNA Repair Mix (New England BioLabs). A 10-fold dilution of adaptors was used, and no size  
198 selection was performed. For both types of samples, twelve cycles of PCR amplification were  
199 performed.

200 Target enrichment was carried out using the MYbaits manual (Arbor Biosciences, USA)  
201 with modifications (Chattopadhyay et al., 2019). We used 1.1uL of baits per fresh sample (~5X  
202 dilution) and 2.46 uL of baits per ancient sample (~2X dilution). For fresh samples, hybridization  
203 of baits and target loci was performed at 65°C for 20 hours and 15 cycles of amplification were  
204 performed. For ancient samples, hybridization was performed at 60°C for 40 hours, and 20  
205 cycles of amplification were performed. For both fresh and ancient samples, one negative control  
206 sample was added for each batch of extraction, library preparation and target enrichment.  
207 Extracts, whole-genome libraries, final enriched libraries, and all negatives were checked for  
208 DNA concentration on a Qubit 2.0 Fluorometer using the Qubit dsDNA HS assay kit  
209 (ThermoFisher Scientific, USA), and were checked for fragment size on a Fragment Analyzer  
210 using the HS NGS Fragment kit (1–6000bp) (Agilent Technologies Inc., USA). Final enriched  
211 libraries were pooled at equimolar quantities. A total of 67 enriched libraries were sequenced,  
212 with fresh and ancient samples sequenced separately on two Illumina HiSeq 150bp paired-end  
213 lanes (NovogeneAIT, Singapore).

#### 214 Reference genome assembly

215 We obtained a sample of *N. phaeopus* (ZMUC 112728) from Natural History Museum of  
216 Denmark, Copenhagen and genomic DNA was extracted using the KingFisher™ Duo Prime

217 Magnetic Particle Processor (ThermoFisher Scientific, USA) and the KingFisher Cell and Tissue  
218 DNA Kit (Thermo Fisher Scientific). A linked-read sequencing library was prepared using the  
219 Chromium Genome library kits (10X Genomics) and sequenced on one Illumina Hiseq X lane at  
220 SciLifeLab Stockholm (Sweden). The *de novo* assembly analysis was performed using 10X  
221 Chromium Supernova (v. 2.1.1). Reads were filtered for low quality and duplication and  
222 assemblies were checked for accuracy and coverage and the best assembly was selected based on  
223 higher genome coverage with fewer errors. The final genome had a size of 1.12Gb at a coverage  
224 of 50X with N50 = 3504.2kbp.

#### 225 Raw reads processing

226         Raw reads were checked for sequencing quality in FastQC 0.11.8 (Babraham  
227 Bioinformatics). Reads were trimmed for low-quality termini and adaptors in fastp 0.20.0 (Chen,  
228 Zhou, Chen, & Gu, 2018). We retained reads with a minimum length of 36bp and set a phred  
229 quality threshold of 20. Retained reads started at the first base satisfying minimum quality  
230 criteria at the 5'-end and were truncated wherever the average quality fell below the threshold in  
231 a sliding window of 5bp. Duplicates were also removed using FastUniq 1.1 (Xu et al., 2012)  
232 before sequence quality, duplication rate and adaptor content were checked again in FastQC. We  
233 employed FastQ Screen 0.14.0 (Wingett & Andrews, 2018) to assign the source of DNA against  
234 a list of potential contaminants. We aligned reads to the assembled *Numenius phaeopus* genome,  
235 *Homo sapiens* (accession no. GCF\_000001405.39) and a concatenated database of all available  
236 bacterial genomes available on GenBank("National Center for Biotechnology Information  
237 (NCBI)," 1988). Only reads that mapped uniquely to the *N. phaeopus* genome were retained.  
238 Reads were sorted and re-paired using BBtools 37.96 (Bushnell, 2014). Downstream

239 bioinformatic procedures were split into single nucleotide polymorphism (SNP)-based and  
240 sequence-based analyses.

#### 241 SNP calling

242 For SNP-based analyses, reads were aligned to the target sequences used for bait design  
243 using bwa-mem 0.7.17 (Li, 2013). The output alignment files were converted to bam files (view)  
244 and sorted by coordinates (sort) using SAMtools 1.9 (Li et al., 2009). Alignments were processed  
245 in Picard 2.20.0 (Picard tools, Broad Institute, Massachusetts, USA) to add read group  
246 information (AddOrReplaceReadGroups), and another round of duplicate identification was  
247 performed (MarkDuplicates) before alignment files were indexed (BuildBamIndex). The  
248 reference file of target sequences was indexed in SAMtools (faidx) and a sequence dictionary  
249 was created in Picard (CreateSequenceDictionary). To improve SNP calling accuracy, indel  
250 realignment was performed in GATK 3.8 (McKenna et al., 2010) (RealignerTargetCreator,  
251 IndelRealigner). We inspected ancient DNA alignments in mapDamage 2.0.9 (Jónsson,  
252 Ginolhac, Schubert, Johnson, & Orlando, 2013) and trimmed up to 5bp from the 3' ends of both  
253 reads to minimise frequencies of G to A misincorporation (<0.1) and soft clipping (<0.2).  
254 Finally, alignments were checked for quality and coverage in QualiMap 2.2.1 (Okonechnikov,  
255 Conesa, & García-Alcalde, 2016).

256 We first generated likelihoods for alignment files in BCFtools 1.9 (Li, 2011) (mpileup),  
257 skipping indels. Using the same program, we then called SNPs (call) using the multiallelic and  
258 rare-variant calling model. Called SNPs were filtered in VCFtools 0.1.16 (Danecek et al., 2011)  
259 to retain sites with quality values >30, mean depth 30–150, minor allele frequency  $\geq 0.02$  and  
260 missing data <5%, in the listed order. Missingness and depth in sites and individuals,  
261 respectively, were quantified for SNPs called. We remove eight individuals from downstream

262 analyses due to a combination of missing data (>0.4%) and low coverage (<36X). A Perl script  
263 was used to call one SNP per locus to avoid calling linked SNPs. SNPs were further screened for  
264 linkage disequilibrium in PLINK 1.9 (Purcell et al., 2007) using a sliding window of 50 SNPs  
265 with a step size of 10 and an  $r^2$  correlation threshold of 0.9. Finally, we also screened for  
266 neutrality of SNPs in BayeScan 2.1 (Foll & Gaggiotti, 2008) using default settings. We created  
267 dedicated SNP sets for input into demographic history reconstruction methods by applying the  
268 method as described above but without minor allele frequency cut-offs and with all SNPs in each  
269 locus retained.

#### 270 Population genomic analyses

271 We conducted principal component analysis (PCA) for all *Numenius* samples using  
272 SNPRelate 1.16.0 (Zheng et al., 2012) in R 3.5.1 (R Core Team, 2018) (Figure S1A). We did not  
273 detect any considerable genomic differentiation along subspecific lines within *N. phaeopus* and  
274 *N. arquata*, whose population-genetic structure had been resolved with thousands of genome-  
275 wide markers in a previous study (Tan et al., 2019) (Figure S1B, C). Samples of *N. p.*  
276 *alboaxillaris* and *N. a. suschkini*, two Central Asian taxa that are described in literature as  
277 phenotypically differentiated (Allport, 2017; Engelmoer & Roselaar, 1998b, 1998a; Morozov,  
278 2000), did not emerge as genomically distinct from other conspecific populations and are likely  
279 to represent ecomorphological adaptations controlled by few genes. Sample NBME 1039630,  
280 which was identified as *N. tenuirostris*, and sample MCZR 15733, which was identified as an *N.*  
281 *arquata* that shares many morphological features with *N. tenuirostris*, clustered with *N. arquata*  
282 samples (Table S1, Figure S1D). Both samples were assigned as *N. arquata* in subsequent  
283 phylogenetic analyses.

#### 284 Sequence assembly

285 For sequence-based analyses, reads were assembled using HybPiper 1.3.1 (Johnson et al.,  
286 2016) (reads\_first) to yield sequence loci. Firstly, reads were mapped to the target sequences  
287 using BWA 0.7.17 (Li & Durbin, 2009) and sorted by gene. Contigs were then assembled from  
288 the reads mapped to respective loci using SPAdes 3.13 (Bankevich et al., 2012) with a coverage  
289 cutoff value of 20. Using Exonerate 2.4.0 (Slater & Birney, 2005), these contigs were then  
290 aligned to the target sequences and sorted before one contig per locus was chosen to yield the  
291 final sequences. We inspected locus lengths (get\_seq\_lengths) and recovery efficiency  
292 (hybpiper\_stats) across all loci. We then investigated potentially paralogous loci  
293 (paralog\_investigator) by building gene trees using FastTree 2.1.11 (Price, Dehal, & Arkin,  
294 2010) (paralog\_retriever), and 10 identified loci were removed. All loci retained were present in  
295 at least 80% of individuals and constituted at least 60% of the total target loci length. In  
296 summary, a total of 525 loci were recovered from 62 samples.

### 297 Phylogenomic analyses

298 Multisequence alignment was performed for each locus using MAFFT 7.470 (Kato &  
299 Standley, 2013), allowing for reverse complement sequences as necessary. Alignments were  
300 checked for gaps using a custom script, and loci with >35% gaps were removed from  
301 downstream analyses. A total alignment length of 514,771bp was obtained.

302 Phylogenomic analyses were performed on a concatenated dataset as well as on  
303 individual gene trees. Concatenation was performed with abioscript 0.9.4 (Larsson, 2010)  
304 (seqConCat). For the concatenated dataset, we constructed maximum-likelihood (ML) trees  
305 using RAxML 8.2.12 (Stamatakis, 2014) with 100 alternative runs on distinct starting trees. We  
306 applied the general time reversible substitution model with gamma distributed rate variation

307 among sites and with estimation of proportion of invariable sites (GTR+I+G) (Abadi, Azouri,  
308 Pupko, & Mayrose, 2019; Arenas, 2015).

309 For individual gene trees, the best substitution model for each locus was determined  
310 using jModelTest 2.1.10 (Darriba, Taboada, Doallo, & Posada, 2012) by virtue of the corrected  
311 Akaike information criterion value. We then constructed ML trees in PhyML 3.1 with the subtree  
312 pruning and regrafting algorithm, using 20 initial random trees. We performed 100 bootstrap  
313 replicates with ML estimates for both proportion of invariable sites and value of the gamma  
314 shape parameter. Individual gene trees were then rooted with Newick Utilities 1.3.0 (Junier &  
315 Zdobnov, 2010). We removed one locus from downstream analyses due to the absence of  
316 outgroup sequence such that 524 loci were retained across 62 samples.

317 Species tree analyses were performed using the rooted trees in MP-EST 1.6 (L. Liu et al.,  
318 2010), without calculation of triple distance among trees. We grouped samples by species and  
319 performed three runs of 10 independent tree searches per dataset (Cloutier et al., 2019). To  
320 calculate bootstrap values of the species tree, we performed multi-locus, site-only resampling  
321 (Mirarab, 2014) from the bootstrap trees (100 per gene) output from PhyML. The resulting 100  
322 files, each with 100 bootstrap trees, were rooted and species tree analyses were performed in the  
323 same manner for each file in MP-EST. The best tree from each run was identified by the best ML  
324 score and compiled. Finally, we used the majority rule in PHYLIP 3.695 (Felsenstein, 2009) to  
325 count the number of times a group descending from each node occurred so as to derive the  
326 bootstrap value (consense).

327 For estimation of divergence times, we applied MCMCtree and BASEML 4.9e (Reis &  
328 Yang, 2011), a package in PAML (Yang, 2007). To prepare the molecular data from 62 samples  
329 and 524 loci, we compiled the DNA sequence of each sample and combined all samples onto

330 separate rows of the same file. We then obtained consensus sequences for each species using  
331 Geneious Prime 2020.2 (Kearse et al., 2012), with a majority support threshold of 50% and  
332 ignoring gaps. We visually checked the resulting consensus sequences to ensure that ambiguous  
333 bases remained infrequent. Consensus sequences were organised by loci as per the input format  
334 for MCMCtree. We then prepared the input phylogenetic tree using the topology estimated in  
335 MP-EST with fossil calibrations of the two most basal nodes, namely between our outgroup  
336 (*Tringa totanus*) and all *Numenius* species, as well as that between the whimbrel and curlew  
337 clades within *Numenius*. Due to a lack of known fossils within the genus *Numenius*, we  
338 performed further calibrations using p-distance values calculated from the COI sequences of  
339 *Numenius* species. We applied the bird COI mutation rate of 1.8% per million year (Lavinia,  
340 Kerr, Tubaro, Hebert, & Lijtmaer, 2016) and converted mean, maximum and minimum p-  
341 distance values of both nodes to time (100 million years ago (MYA)). We maintained a  
342 conservative position and scaled the COI-based timings by a factor of two to obtain the final  
343 lower and upper bounds of node timings. We used the default probability of 0.025 that the true  
344 node age is outside the calibration provided.

345 To run MCMCtree, we first calculated the gradient and Hessian matrix of the branch  
346 lengths with the GTR substitution model applied and using default values of gamma rates and  
347 numbers of categories (mcmctree-outBV.ctl). We then performed two independent Markov chain  
348 Monte Carlo (MCMC) samplings of the posterior distribution of divergence times and rates  
349 (mcmctree.ctl). All default values were used except that a constraint on the root age was set to  
350 <0.3 (100 MYA). We also varied the prior for the birth-death process with species sampling and  
351 ensured that time estimates are not affected by the priors applied (dos Reis & Yang, 2019). We  
352 then performed convergence diagnostics for both runs using R to ensure that posterior means are



353 similar among multiple runs, ensuring that the parameter space has been explored thoroughly by  
354 the MCMC chain. Finally, we conducted MCMC sampling from the prior with no data to check  
355 the validity of priors used by comparing them with posterior times estimated. Again, two  
356 independent MCMC samplings were performed with convergence diagnostics.

357 Phylogenetic trees were visualised in FigTree 1.4.4 (Rambaut, 2018) with bootstrap  
358 values and node ages (MYA) including the 95% credibility intervals. Evolutionary distinctness  
359 and phylogenetic diversity was calculated for each branch (Jetz et al., 2014) using the divergence  
360 times estimated in MCMCTree.

### 361 Demographic history reconstruction

362 We derived trends in effective population size using stairway plot 2.1.1 (X. Liu & Fu,  
363 2015) applying the recommended parameters. From the dedicated SNP sets that were created  
364 without minor allele frequency cut-off, we calculated a folded site frequency spectrum using  
365 vcf2sfs.py 1.1 (Marques, Lucek, Sousa, Excoffier, & Seehausen, 2019). We ran stairway plots  
366 for each species with five or more samples, as recommended for accurate inference  
367 (stairway\_plot\_es Stairbuilder). We assumed a mutation rate per site per generation of  $8.11e^{-8}$ ,  
368 as estimated for shorebirds in the same order as *Numenius* (Charadriiformes) (Wang et al., 2019),  
369 and respective generation times of 5–8 years respectively (Bird et al., 2020; IUCN, 2020).

### 370 **Acknowledgements**

371 We thank the following personnel and institutions for the generous contribution of  
372 samples (Table S1): Paul Sweet and Thomas Trombone at the American Museum of Natural  
373 History (AMNH, New York); Robert Palmer and Leo Joseph at the Australian National Wildlife  
374 Collection (ANWC, Canberra); Molly Hagemann at the Bernice Pauahi Bishop Museum

375 (BPBM, Hawaii); David Allan at the Durban Natural Science Museum (DNSM, Durban) and  
376 Celine Santillan who assisted in sample transport; Ben Marks at the Field Museum of Natural  
377 History (FMNH, Chicago); Foo Maosheng at the Lee Kong Chian Natural History Museum  
378 (LKCNHM, Singapore); Carla Marangoni and Gloria Svampa at the Museo Civico di Zoologia  
379 (MCZR, Rome); Henry McGhie at the University of Manchester, Manchester Museum (MMUM,  
380 Manchester); Robert Prÿs-Jones, Mark Adams, Alex Bond, Ari Benucci and Douglas Russell at  
381 the Natural History Museum, London (NHMUK, Tring); Manuel Schweizer at the  
382 Naturhistorisches Museum der Bürgergemeinde Bern (NMBE, Bern); Bob McGowan at the  
383 Natural Museum of Scotland (NMS, Edinburgh); Joanna Sumner at Museums Victoria (NMV,  
384 Melbourne); Angela Ross at the National Museums NI (NMNI, Northern Ireland) and David  
385 Allen and Graeme Buchanan who assisted in sample transport; Jan Bolding Kristensen at the  
386 Natural History Museum of Denmark (SNM, Copenhagen); José Alves and Camilo Carneiro at  
387 the University of Iceland (UOI, Reykjavik); Sharon Birks at the Burke Museum, University of  
388 Washington (UWBM, Washington); Pavel S. Tomkovich, Dmitry Shitikov and Vladimir  
389 Sotnikov at the Zoological Museum of Moscow State University (ZMMU, Moscow); and Fyodor  
390 Kondrashov and Lisa Chilton who assisted in sample transport. Fletcher Smith assisted in  
391 Mozambique (with permission from Lucilia Chuquela, Museu de História Natural and  
392 Universidade Eduardo Mondlane, Maputo) with further assistance from Rebecca and Cyril  
393 Kormos, Patricia Zurita and Vinayagan Dhamarajah. HZT acknowledges Elize Ying Xin Ng,  
394 Pratibha Baveja, Yong Chee Keita Sin, Shivaram Rasu, Dominic Yong Jie Ng, and Wu Meng  
395 Yue for assistance in laboratory procedures and analyses. The authors acknowledge support from  
396 the National Genomics Infrastructure in Stockholm funded by Science for Life Laboratory, the  
397 Knut and Alice Wallenberg Foundation and the Swedish Research Council, and SNIC/Uppsala

398 Multidisciplinary Center for Advanced Computational Science for assistance with massively  
399 parallel sequencing and access to the UPPMAX computational infrastructure. KMG  
400 acknowledges support from the DBT-Ramalingaswami Fellowship (No. BT/HRD/35/02/2006).  
401 BC acknowledges funding from the South East Asian Biodiversity Genomics (SEABIG) Grant  
402 (numbers WBS R-154-000-648-646 and WBS R-154-000-648-733) and startup funding from  
403 Trivedi School of Biosciences, Ashoka University.

#### 404 **Competing interests**

405 The authors declare no competing interests.

#### 406 **Author Contributions**

407 FER, JJFJJ, GAA, HZT conceptualised the research aims. JJFJJ, GAA, GC and HZT collected  
408 samples, KMG and BC designed the probes set and MI constructed the reference genome. HZT  
409 performed all laboratory procedures with guidance from CYG, KMG and BC. HZT performed  
410 all bioinformatic analyses with guidance from CYG and FER. HZT and FER produced the initial  
411 draft of the manuscript which was reviewed by all co-authors.

#### 412 **References**

- 413 Abadi, S., Azouri, D., Pupko, T., & Mayrose, I. (2019). Model selection may not be a mandatory  
414 step for phylogeny reconstruction. *Nature Communications*, *10*(1), 1–11.  
415 <https://doi.org/10.1038/s41467-019-08822-w>
- 416 Allport, G. (2017). Steppe Whimbrels *Numenius phaeopus alboaxillaris* at Maputo,  
417 Mozambique, in February–March 2016, with a review of the status of the taxon. *Bulletin of*  
418 *the African Bird Club*, *24*(1), 1–12.
- 419 Arenas, M. (2015). Trends in substitution models of molecular evolution. *Frontiers in Genetics*,  
420 *6*(OCT), 319. <https://doi.org/10.3389/fgene.2015.00319>
- 421 Bakker, E. S., Gill, J. L., Johnson, C. N., Vera, F. W. M., Sandom, C. J., Asner, G. P., &  
422 Svenning, J. C. (2016). Combining paleo-data and modern exclosure experiments to assess  
423 the impact of megafauna extinctions on woody vegetation. *Proceedings of the National*  
424 *Academy of Sciences of the United States of America*, *113*(4), 847–855.  
425 <https://doi.org/10.1073/pnas.1502545112>

- 426 Bankevich, A., Nurk, S., Antipov, D., Gurevich, A. A., Dvorkin, M., Kulikov, A. S., ... Pevzner,  
427 P. A. (2012). SPAdes: A new genome assembly algorithm and its applications to single-cell  
428 sequencing. *Journal of Computational Biology*, 19(5), 455–477.  
429 <https://doi.org/10.1089/cmb.2012.0021>
- 430 Bigelow, N. H., Brubaker, L. B., Edwards, M. E., Harrison, S. P., Prentice, I. C., Anderson, P.  
431 M., ... Volkova, V. S. (2003). Climate change and Arctic ecosystems: 1. Vegetation  
432 changes north of 55°N between the last glacial maximum, mid-Holocene, and present.  
433 *Journal of Geophysical Research: Atmospheres*, 108(19), 8170.  
434 <https://doi.org/10.1029/2002jd002558>
- 435 Billerman, S. M., Keeney, B. K., Rodewald, P. G., & Schulenberg, T. S. (Eds.). (2020). *Birds of*  
436 *the World*. Ithaca, NY, USA: Cornell Laboratory of Ornithology. Retrieved from  
437 <https://birdsoftheworld.org/bow/home>
- 438 Binney, H., Edwards, M., Macias-Fauria, M., Lozhkin, A., Anderson, P., Kaplan, J. O., ...  
439 Zernitskaya, V. (2017). Vegetation of Eurasia from the last glacial maximum to present:  
440 Key biogeographic patterns. *Quaternary Science Reviews*, 157, 80–97.  
441 <https://doi.org/10.1016/j.quascirev.2016.11.022>
- 442 Bird, J. P., Martin, R., Re, H., Gilroy, J., Burfield, I. J., Garnett, S. T., ... Butchart, S. H. M.  
443 (2020). Generation lengths of the world's birds and their implications for extinction risk.  
444 *Conservation Biology*, 34(5), 1252–1261. <https://doi.org/10.1111/cobi.13486>
- 445 Buchanan, G. M., Bond, A. L., Pearce-Higgins, J. W., Hilton, G. M., Crockford, N. J., & Kamp,  
446 J. (2018). The potential breeding range of Slender-billed Curlew *Numenius tenuirostris*  
447 identified from stable-isotope analysis. *Bird Conservation International*, 28(2), 228–237.  
448 <https://doi.org/10.1017/S0959270916000551>
- 449 Bushnell, B. (2014). BBMap. Retrieved from <https://sourceforge.net/projects/bbmap/>
- 450 Butchart, S. H. M., Lowe, S., Martin, R. W., Symes, A., Westrip, J. R. S., & Wheatley, H.  
451 (2018). Which bird species have gone extinct? A novel quantitative classification approach.  
452 *Biological Conservation*, 227, 9–18. <https://doi.org/10.1016/j.biocon.2018.08.014>
- 453 Cahill, A. E., Aiello-Lammens, M. E., Caitlin Fisher-Reid, M., Hua, X., Karanewsky, C. J., Ryu,  
454 H. Y., ... Wiens, J. J. (2013). How does climate change cause extinction? *Proceedings of*  
455 *the Royal Society B: Biological Sciences*, 280(1750), 20121890.  
456 <https://doi.org/10.1098/rspb.2012.1890>
- 457 Ceballos, G., Davidson, A., List, R., Pacheco, J., Manzano-Fischer, P., Santos-Barrera, G., &  
458 Cruzado, J. (2010). Rapid decline of a grassland system and its ecological and conservation  
459 implications. *PLoS ONE*, 5(1), e8562. <https://doi.org/10.1371/journal.pone.0008562>
- 460 Chan, Y. L., Lacey, E. A., Pearson, O. P., & Hadly, E. A. (2005). Ancient DNA reveals  
461 Holocene loss of genetic diversity in a South American rodent. *Biology Letters*, 1(4), 423–  
462 426. <https://doi.org/10.1098/rsbl.2005.0354>
- 463 Chattopadhyay, B., Garg, K. M., Mendenhall, I. H., & Rheindt, F. E. (2019). Historic DNA  
464 reveals Anthropocene threat to a tropical urban fruit bat. *Current Biology*, 29, R1269–  
465 R1300. <https://doi.org/10.1016/j>

- 466 Chen, S., Zhou, Y., Chen, Y., & Gu, J. (2018). Fastp: An ultra-fast all-in-one FASTQ  
467 preprocessor. *Bioinformatics*, *34*(17), i884–i890.  
468 <https://doi.org/10.1093/bioinformatics/bty560>
- 469 Cloutier, A., Sackton, T. B., Grayson, P., Clamp, M., Baker, A. J., & Edwards, S. V. (2019).  
470 Whole-genome analyses resolve the phylogeny of flightless birds (Palaeognathae) in the  
471 presence of an empirical anomaly zone. *Systematic Biology*, *68*(6), 937–955.  
472 <https://doi.org/10.1093/sysbio/syz019>
- 473 Crowley, T. J., & North, G. R. (1988). Abrupt climate change and extinction events in earth  
474 history. *Science*, *240*(4855), 996–1002. <https://doi.org/10.1126/science.240.4855.996>
- 475 Danecek, P., Auton, A., Abecasis, G., Albers, C. A., Banks, E., DePristo, M. A., ... Durbin, R.  
476 (2011). The variant call format and VCFtools. *Bioinformatics*, *27*(15), 2156–2158.  
477 <https://doi.org/10.1093/bioinformatics/btr330>
- 478 Dansgaard, W., Johnsen, S. J., Clausen, H. B., Dahl-Jensen, D., Gundestrup, N. S., Hammer, C.  
479 U., ... Bond, G. (1993). Evidence for general instability of past climate from a 250-kyr ice-  
480 core record. *Nature*, *364*(6434), 218–220. <https://doi.org/10.1038/364218a0>
- 481 Darriba, D., Taboada, G. L., Doallo, R., & Posada, D. (2012, August 30). JModelTest 2: More  
482 models, new heuristics and parallel computing. *Nature Methods*. Nature Publishing Group.  
483 <https://doi.org/10.1038/nmeth.2109>
- 484 dos Reis, M., & Yang, Z. (2019). Bayesian molecular clock dating using genome-scale datasets.  
485 In *Methods in Molecular Biology* (Vol. 1910, pp. 309–330). Humana Press Inc.  
486 [https://doi.org/10.1007/978-1-4939-9074-0\\_10](https://doi.org/10.1007/978-1-4939-9074-0_10)
- 487 Engelmoer, M., & Roselaar, C. S. (1998a). Eurasian curlew *Numenius arquata*. In M. Engelmoer  
488 & C. S. Roselaar (Eds.), *Geographical variation in waders* (pp. 213–223). Dordrecht,  
489 Netherlands: Springer Science+Business Media B.V. [https://doi.org/10.1007/978-94-011-](https://doi.org/10.1007/978-94-011-5016-3)  
490 [5016-3](https://doi.org/10.1007/978-94-011-5016-3)
- 491 Engelmoer, M., & Roselaar, C. S. (1998b). Whimbrel *Numenius phaeopus*. In M. Engelmoer &  
492 C. S. Roselaar (Eds.), *Geographical variation in waders* (pp. 199–212). Dordrecht,  
493 Netherlands: Springer Science+Business Media B.V. [https://doi.org/10.1007/978-94-011-](https://doi.org/10.1007/978-94-011-5016-3)  
494 [5016-3](https://doi.org/10.1007/978-94-011-5016-3)
- 495 Felsenstein, J. (2009). PHYLIP (PHYLogeny Inference Package). Retrieved from  
496 <https://evolution.genetics.washington.edu/phylip.html>
- 497 Foll, M., & Gaggiotti, O. (2008). A genome-scan method to identify selected loci appropriate for  
498 both dominant and codominant markers: a Bayesian perspective. *Genetics*, *180*(2), 977–  
499 993. <https://doi.org/10.1534/genetics.108.092221>
- 500 Frankham, R. (2005). Genetics and extinction. *Biological Conservation*, *126*(2), 131–140.  
501 <https://doi.org/10.1016/j.biocon.2005.05.002>
- 502 Helm, A., Oja, T., Saar, L., Takkis, K., Talve, T., & Pärtel, M. (2009). Human influence lowers  
503 plant genetic diversity in communities with extinction debt. *Journal of Ecology*, *97*(6),  
504 1329–1336. <https://doi.org/10.1111/j.1365-2745.2009.01572.x>

- 505 IUCN. (2020). The IUCN Red List of Threatened Species. Version 2020-3. Retrieved from  
506 <https://www.iucnredlist.org>
- 507 Jetz, W., Thomas, G. H., Joy, J. B., Redding, D. W., Hartmann, K., & Mooers, A. O. (2014).  
508 Global distribution and conservation of evolutionary distinctness in birds. *Current Biology*,  
509 *24*(9), 919–930. <https://doi.org/10.1016/j.cub.2014.03.011>
- 510 Johnson, M. G., Gardner, E. M., Liu, Y., Medina, R., Goffinet, B., Shaw, A. J., ... Wickett, N. J.  
511 (2016). HybPiper: Extracting coding sequence and introns for phylogenetics from high-  
512 throughput sequencing reads using target enrichment. *Applications in Plant Sciences*, *4*(7),  
513 1600016. <https://doi.org/10.3732/apps.1600016>
- 514 Jónsson, H., Ginolhac, A., Schubert, M., Johnson, P. L. F., & Orlando, L. (2013).  
515 mapDamage2.0: Fast approximate Bayesian estimates of ancient DNA damage parameters.  
516 In *Bioinformatics* (Vol. 29, pp. 1682–1684). Oxford Academic.  
517 <https://doi.org/10.1093/bioinformatics/btt193>
- 518 Junier, T., & Zdobnov, E. M. (2010). The Newick utilities: high-throughput phylogenetic tree  
519 processing in the UNIX shell. *Bioinformatics*, *26*(13), 1669–1670.  
520 <https://doi.org/10.1093/bioinformatics/btq243>
- 521 Katoh, K., & Standley, D. M. (2013). MAFFT multiple sequence alignment software version 7:  
522 Improvements in performance and usability. *Molecular Biology and Evolution*, *30*(4), 772–  
523 780. <https://doi.org/10.1093/molbev/mst010>
- 524 Kearse, M., Moir, R., Wilson, A., Stones-Havas, S., Cheung, M., Sturrock, S., ... Drummond, A.  
525 (2012). Geneious Basic: An integrated and extendable desktop software platform for the  
526 organization and analysis of sequence data. *Bioinformatics*, *28*(12), 1647–1649.  
527 <https://doi.org/10.1093/bioinformatics/bts199>
- 528 Kirwan, G., Porter, R., & Scott, D. (2015). Chronicle of an extinction? A review of slender-billed  
529 curlew records in the Middle East. *British Birds*, *108*(11), 669–682.
- 530 Koch, P. L., & Barnosky, A. D. (2006). Late quaternary extinctions: State of the debate. *Annual*  
531 *Review of Ecology, Evolution, and Systematics*, *37*(1), 215–250.  
532 <https://doi.org/10.1146/annurev.ecolsys.34.011802.132415>
- 533 Küpper, C., Stocks, M., Risse, J. E., Dos Remedios, N., Farrell, L. L., McRae, S. B., ... Burke,  
534 T. (2015). A supergene determines highly divergent male reproductive morphs in the ruff.  
535 *Nature Genetics*, *48*(1), 79–83. <https://doi.org/10.1038/ng.3443>
- 536 Kuussaari, M., Bommarco, R., Heikkinen, R. K., Helm, A., Krauss, J., Lindborg, R., ... Steffan-  
537 Dewenter, I. (2009). Extinction debt: a challenge for biodiversity conservation. *Trends in*  
538 *Ecology and Evolution*, *24*(10), 564–571. <https://doi.org/10.1016/j.tree.2009.04.011>
- 539 Larsson, A. (2010). abioscript. Retrieved from <http://www.ormbunkar.se/phylogeny/abioscripts/>
- 540 Lavinia, P. D., Kerr, K. C. R., Tubaro, P. L., Hebert, P. D. N., & Lijtmaer, D. A. (2016).  
541 Calibrating the molecular clock beyond cytochrome b: Assessing the evolutionary rate of  
542 COI in birds. *Journal of Avian Biology*, *47*(1), 84–91. <https://doi.org/10.1111/jav.00766>
- 543 Lemoine, N., & Böhning-Gaese, K. (2003). Potential impact of global climate change on species

- 544 richness of long-distance migrants. *Conservation Biology*, 17(2), 577–586.  
545 <https://doi.org/10.1046/j.1523-1739.2003.01389.x>
- 546 Li, C., Riethoven, J. J. M., & Naylor, G. J. P. (2012). EvolMarkers: A database for mining exon  
547 and intron markers for evolution, ecology and conservation studies. *Molecular Ecology*  
548 *Resources*, 12(5), 967–971. <https://doi.org/10.1111/j.1755-0998.2012.03167.x>
- 549 Li, H. (2011). A statistical framework for SNP calling, mutation discovery, association mapping  
550 and population genetical parameter estimation from sequencing data. *Bioinformatics*,  
551 27(21), 2987–2993. <https://doi.org/10.1093/bioinformatics/btr509>
- 552 Li, H. (2013). Aligning sequence reads, clone sequences and assembly contigs with BWA-MEM.  
553 *ArXiv Preprint*.
- 554 Li, H., & Durbin, R. (2009). Fast and accurate short read alignment with Burrows-Wheeler  
555 transform. *Bioinformatics*, 25(14), 1754–1760.  
556 <https://doi.org/10.1093/bioinformatics/btp324>
- 557 Li, H., Handsaker, B., Wysoker, A., Fennell, T., Ruan, J., Homer, N., ... Durbin, R. (2009). The  
558 sequence alignment/map format and SAMtools. *Bioinformatics*, 25(16), 2078–2079.  
559 <https://doi.org/10.1093/bioinformatics/btp352>
- 560 Liu, L., Yu, L., & Edwards, S. V. (2010). A maximum pseudo-likelihood approach for  
561 estimating species trees under the coalescent model. *BMC Evolutionary Biology*, 10(1), 302.  
562 <https://doi.org/10.1186/1471-2148-10-302>
- 563 Liu, X., & Fu, Y. X. (2015). Exploring population size changes using SNP frequency spectra.  
564 *Nature Genetics*, 47(5), 555–559. <https://doi.org/10.1038/ng.3254>
- 565 Marques, D. A., Lucek, K., Sousa, V. C., Excoffier, L., & Seehausen, O. (2019). Admixture  
566 between old lineages facilitated contemporary ecological speciation in Lake Constance  
567 stickleback. *Nature Communications*, 10(1), 1–14. <https://doi.org/10.1038/s41467-019-12182-w>
- 569 McKenna, A., Hanna, M., Banks, E., Sivachenko, A., Cibulskis, K., Kernytsky, A., ... DePristo,  
570 M. A. (2010). The genome analysis toolkit: A MapReduce framework for analyzing next-  
571 generation DNA sequencing data. *Genome Research*, 20(9), 1297–1303.  
572 <https://doi.org/10.1101/gr.107524.110>
- 573 Mirarab, S. (2014). Multi-locus-bootstrapping. Retrieved February 25, 2021, from  
574 <https://github.com/smirarab/multi-locus-bootstrapping>
- 575 Morozov, V. V. (2000). Current status of the southern subspecies of the whimbrel *Numenius*  
576 *phaeopus alboaxillaris* (Lowe 1921) in Russia and Kazakstan. *Wader Study Group Bulletin*,  
577 92(August), 30–37. Retrieved from  
578 [http://scholar.google.com/scholar?hl=en&btnG=Search&q=intitle:Current+status+of+the+southern+subspecies+of+the+Whimbrel+Numenius+phaeopus+alboaxillaris+\(Lowe+1921\)+in+Russia+and+Kazakstan#0](http://scholar.google.com/scholar?hl=en&btnG=Search&q=intitle:Current+status+of+the+southern+subspecies+of+the+Whimbrel+Numenius+phaeopus+alboaxillaris+(Lowe+1921)+in+Russia+and+Kazakstan#0)
- 581 Nakahama, N., Uchida, K., Ushimaru, A., & Isagi, Y. (2018). Historical changes in grassland  
582 area determined the demography of semi-natural grassland butterflies in Japan. *Heredity*,  
583 121(2), 155–168. <https://doi.org/10.1038/s41437-018-0057-2>

- 584 National Center for Biotechnology Information (NCBI). (1988). Retrieved from  
585 <https://www.ncbi.nlm.nih.gov/>
- 586 Okonechnikov, K., Conesa, A., & García-Alcalde, F. (2016). Qualimap 2: Advanced multi-  
587 sample quality control for high-throughput sequencing data. *Bioinformatics*, 32(2), 292–  
588 294. <https://doi.org/10.1093/bioinformatics/btv566>
- 589 Pearce-Higgins, J. W., Brown, D. J., Douglas, D. J. T., Alves, J. A., Bellio, M., Bocher, P., ...  
590 Soloviev, S. A. (2017). A global threats overview for Numeniini populations: synthesising  
591 expert knowledge for a group of declining migratory birds. *Bird Conservation*  
592 *International*, 27, 6–34. <https://doi.org/10.1017/S0959270916000678>
- 593 Pimm, S. L., Jenkins, C. N., Abell, R., Brooks, T. M., Gittleman, J. L., Joppa, L. N., ... Sexton,  
594 J. O. (2014). The biodiversity of species and their rates of extinction, distribution, and  
595 protection. *Science*, 344(6187). <https://doi.org/10.1126/science.1246752>
- 596 Price, M. N., Dehal, P. S., & Arkin, A. P. (2010). FastTree 2 - Approximately maximum-  
597 likelihood trees for large alignments. *PLoS ONE*, 5(3), e9490.  
598 <https://doi.org/10.1371/journal.pone.0009490>
- 599 Purcell, S., Neale, B., Todd-Brown, K., Thomas, L., Ferreira, M. A. R., Bender, D., ... Sham, P.  
600 C. (2007). PLINK: A tool set for whole-genome association and population-based linkage  
601 analyses. *American Journal of Human Genetics*, 81(3), 559–575.  
602 <https://doi.org/10.1086/519795>
- 603 Quinlan, A. R., & Hall, I. M. (2010). BEDTools: A flexible suite of utilities for comparing  
604 genomic features. *Bioinformatics*, 26(6), 841–842.  
605 <https://doi.org/10.1093/bioinformatics/btq033>
- 606 R Core Team. (2018). R: A language and environment for statistical computing. R Foundation  
607 for Statistical Computing, Vienna, Austria. Retrieved from <http://www.r-project.org/>
- 608 Rambaut, A. (2018). FigTree 1.4.4. Retrieved from <https://github.com/rambaut/figtree>
- 609 Reis, M. Dos, & Yang, Z. (2011). Approximate likelihood calculation on a phylogeny for  
610 Bayesian estimation of divergence times. *Molecular Biology and Evolution*, 28(7), 2161–  
611 2172. <https://doi.org/10.1093/molbev/msr045>
- 612 Roberts, D. L., Elphick, C. S., & Reed, J. M. (2010). Identifying anomalous reports of putatively  
613 extinct species and why it matters: Contributed paper. *Conservation Biology*, 24(1), 189–  
614 196. <https://doi.org/10.1111/j.1523-1739.2009.01292.x>
- 615 Roberts, D. L., & Jarić, I. (2016). Inferring extinction in North American and Hawaiian birds in  
616 the presence of sighting uncertainty. *PeerJ*, 2016(9), e2426.  
617 <https://doi.org/10.7717/peerj.2426>
- 618 Sharko, F. S., Boulygina, E. S., Rastorguev, S. M., Tsygankova, S. V., Tomkovich, P. S., &  
619 Nedoluzhko, A. V. (2019). Phylogenetic position of the presumably extinct slender-billed  
620 curlew, *Numenius tenuirostris*. *Mitochondrial DNA Part A: DNA Mapping, Sequencing,*  
621 *and Analysis*, 30(4), 626–631. <https://doi.org/10.1080/24701394.2019.1597862>
- 622 Slater, G. S. C., & Birney, E. (2005). Automated generation of heuristics for biological sequence



- 623 comparison. *BMC Bioinformatics*, 6(1), 1–11. <https://doi.org/10.1186/1471-2105-6-31>
- 624 Smit, A., Hubley, R., & Green, P. (2015). RepeatMasker Open-4.0.6. Retrieved from  
625 <http://www.repeatmasker.org/>
- 626 Stamatakis, A. (2014). RAxML version 8: a tool for phylogenetic analysis and post-analysis of  
627 large phylogenies. *Bioinformatics*, 30(9), 1312–1313.  
628 <https://doi.org/10.1093/bioinformatics/btu033>
- 629 Tan, H. Z., Ng, E. Y. X., Tang, Q., Allport, G. A., Jansen, J. J. F. J., Tomkovich, Pavel S., &  
630 Rheindt, F. E. (2019). Population genomics of two congeneric Palaearctic shorebirds  
631 reveals differential impacts of Quaternary climate oscillations across habitats types.  
632 *Scientific Reports*, 9(1), 18172. <https://doi.org/10.1038/s41598-019-54715-9>
- 633 Török, P., Ambarlı, D., Kamp, J., Wesche, K., & Dengler, J. (2016). Step(pe) up! Raising the  
634 profile of the Palaearctic natural grasslands. *Biodiversity and Conservation*, 25(12), 2187–  
635 2195. <https://doi.org/10.1007/s10531-016-1187-6>
- 636 Turvey, S. T., & Crees, J. J. (2019). Extinction in the Anthropocene. *Current Biology*, 29(19),  
637 R982–R986. <https://doi.org/10.1016/j.cub.2019.07.040>
- 638 Urban, M. C. (2015). Accelerating extinction risk from climate change. *Science*, 348(6234),  
639 571–573. <https://doi.org/10.1126/science.aaa4984>
- 640 Wang, X., Maher, K. H., Zhang, N., Que, P., Zheng, C., Liu, S., ... Liu, Y. (2019). Demographic  
641 histories and genome-wide patterns of divergence in incipient species of shorebirds.  
642 *Frontiers in Genetics*, 10, 919. <https://doi.org/10.3389/fgene.2019.00919>
- 643 Wesche, K., Ambarlı, D., Kamp, J., Török, P., Treiber, J., & Dengler, J. (2016). The Palaearctic  
644 steppe biome: a new synthesis. *Biodiversity and Conservation*, 25(12), 2197–2231.  
645 <https://doi.org/10.1007/s10531-016-1214-7>
- 646 Wingett, S. W., & Andrews, S. (2018). FastQ Screen: A tool for multi-genome mapping and  
647 quality control. *F1000Research*, 7, 1338. <https://doi.org/10.12688/f1000research.15931.2>
- 648 Xu, H., Luo, X., Qian, J., Pang, X., Song, J., Qian, G., ... Chen, S. (2012). FastUniq: A fast de  
649 novo duplicates removal tool for paired short reads. *PLoS ONE*, 7(12), e52249.  
650 <https://doi.org/10.1371/journal.pone.0052249>
- 651 Yang, Z. (2007). PAML 4: Phylogenetic analysis by maximum likelihood. *Molecular Biology  
652 and Evolution*, 24(8), 1586–1591. <https://doi.org/10.1093/molbev/msm088>
- 653 Zheng, X., Levine, D., Shen, J., Gogarten, S. M., Laurie, C., & Weir, B. S. (2012). A high-  
654 performance computing toolset for relatedness and principal component analysis of SNP  
655 data. *Bioinformatics*, 28(24), 3326–3328. <https://doi.org/10.1093/bioinformatics/bts606>
- 656 Zimov, S. A., Chuprynin, V. I., Oreshko, A. P., Chapin, F. S., Reynolds, J. F., & Chapin, M. C.  
657 (1995). Steppe-tundra transition: A herbivore-driven biome shift at the end of the  
658 Pleistocene. *American Naturalist*, 146(4), 765–794. <https://doi.org/10.1086/285824>
- 659

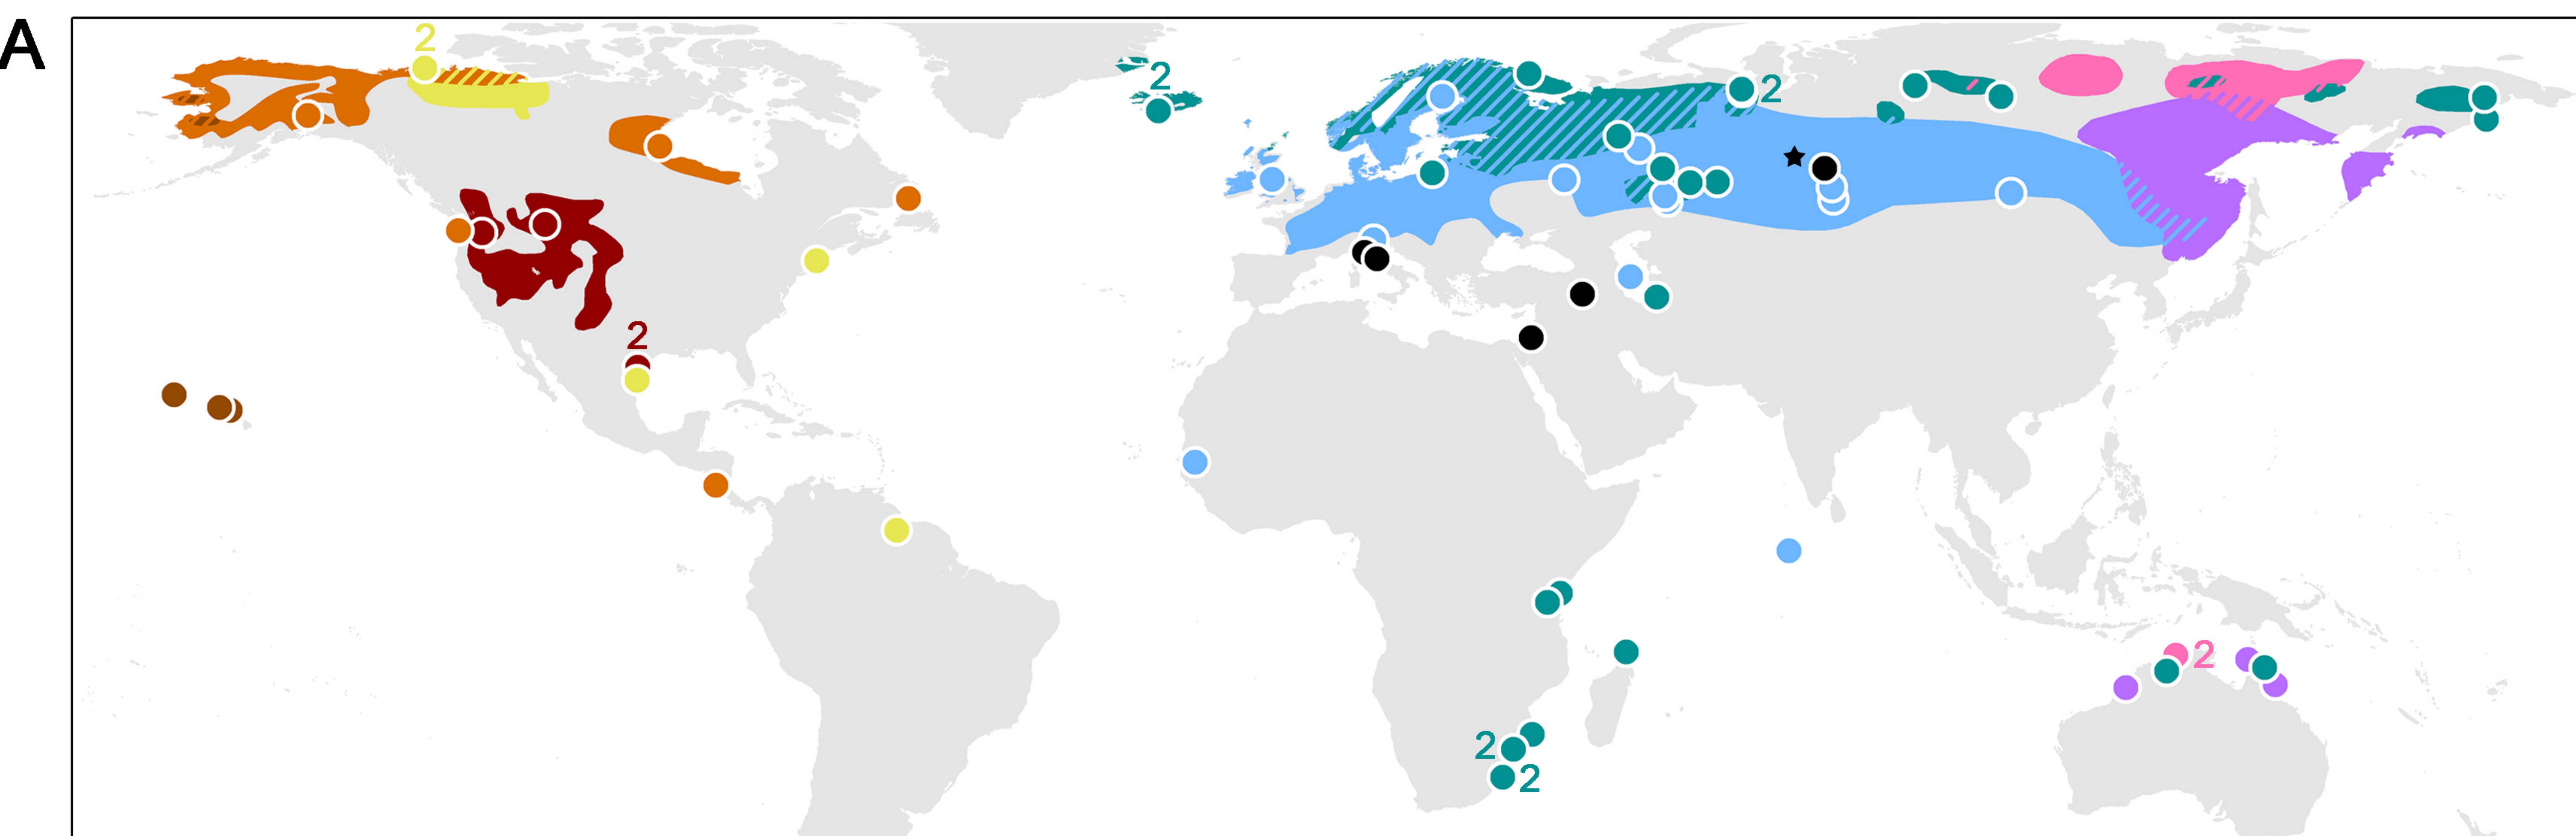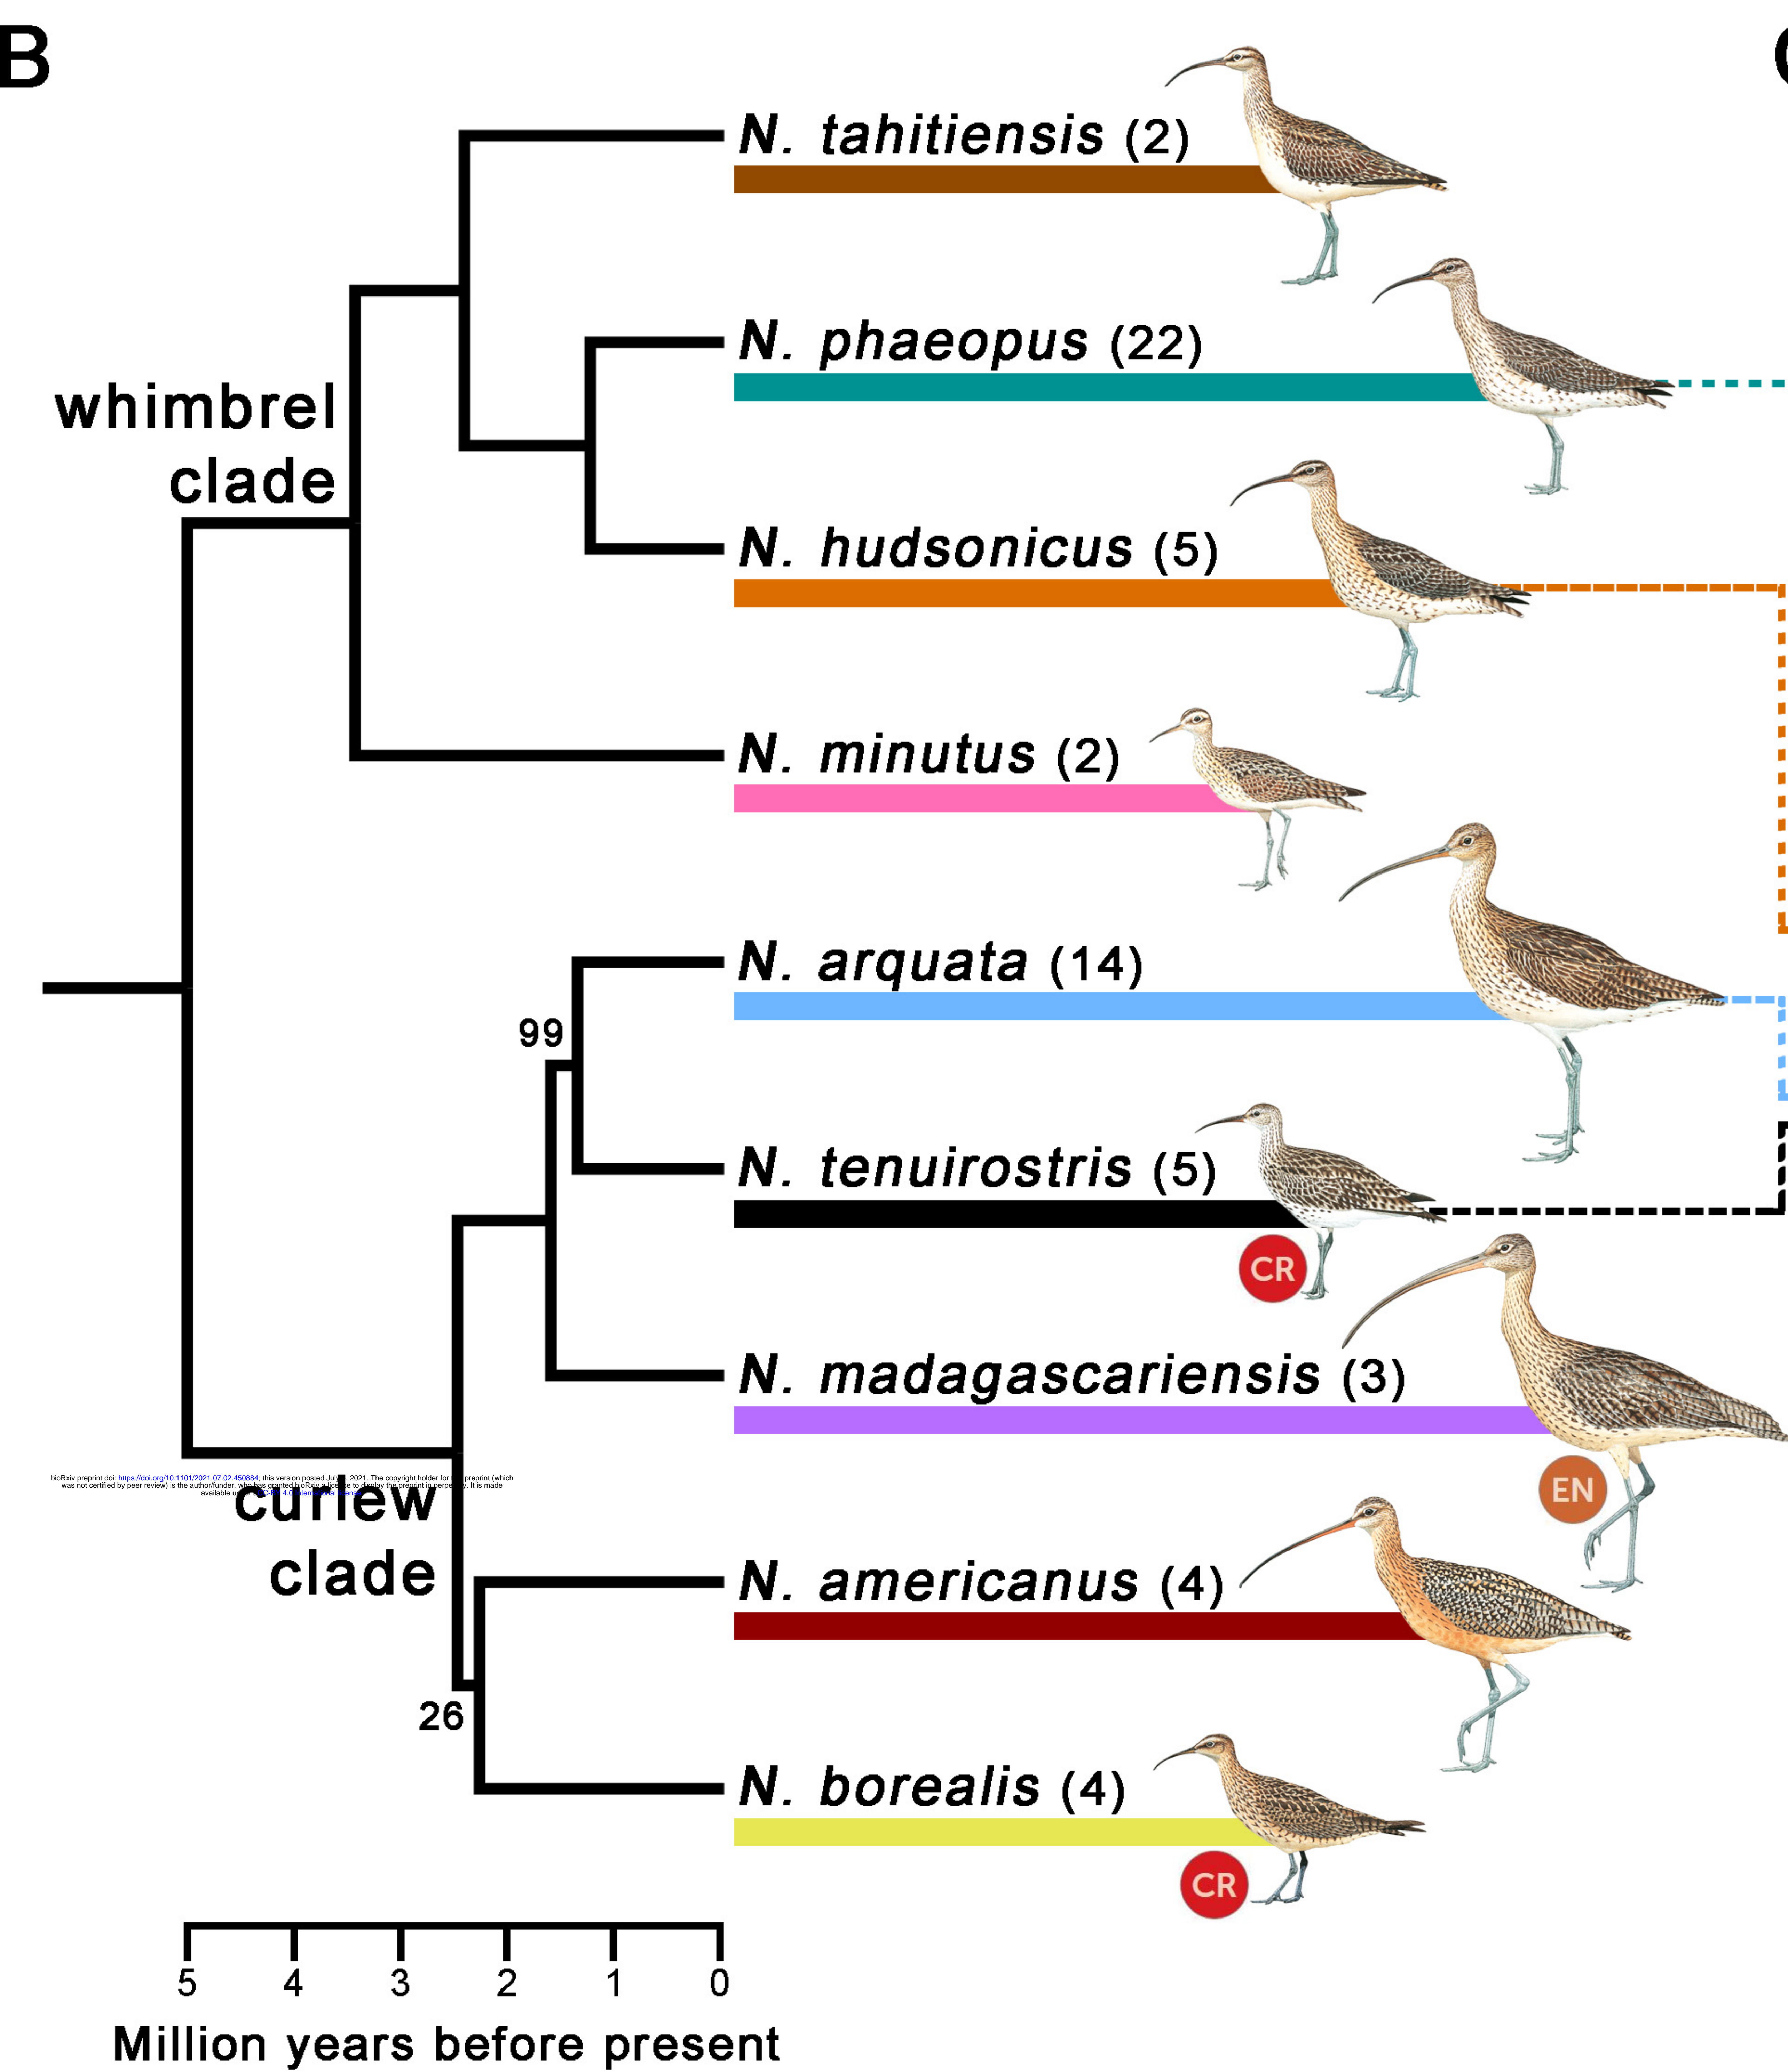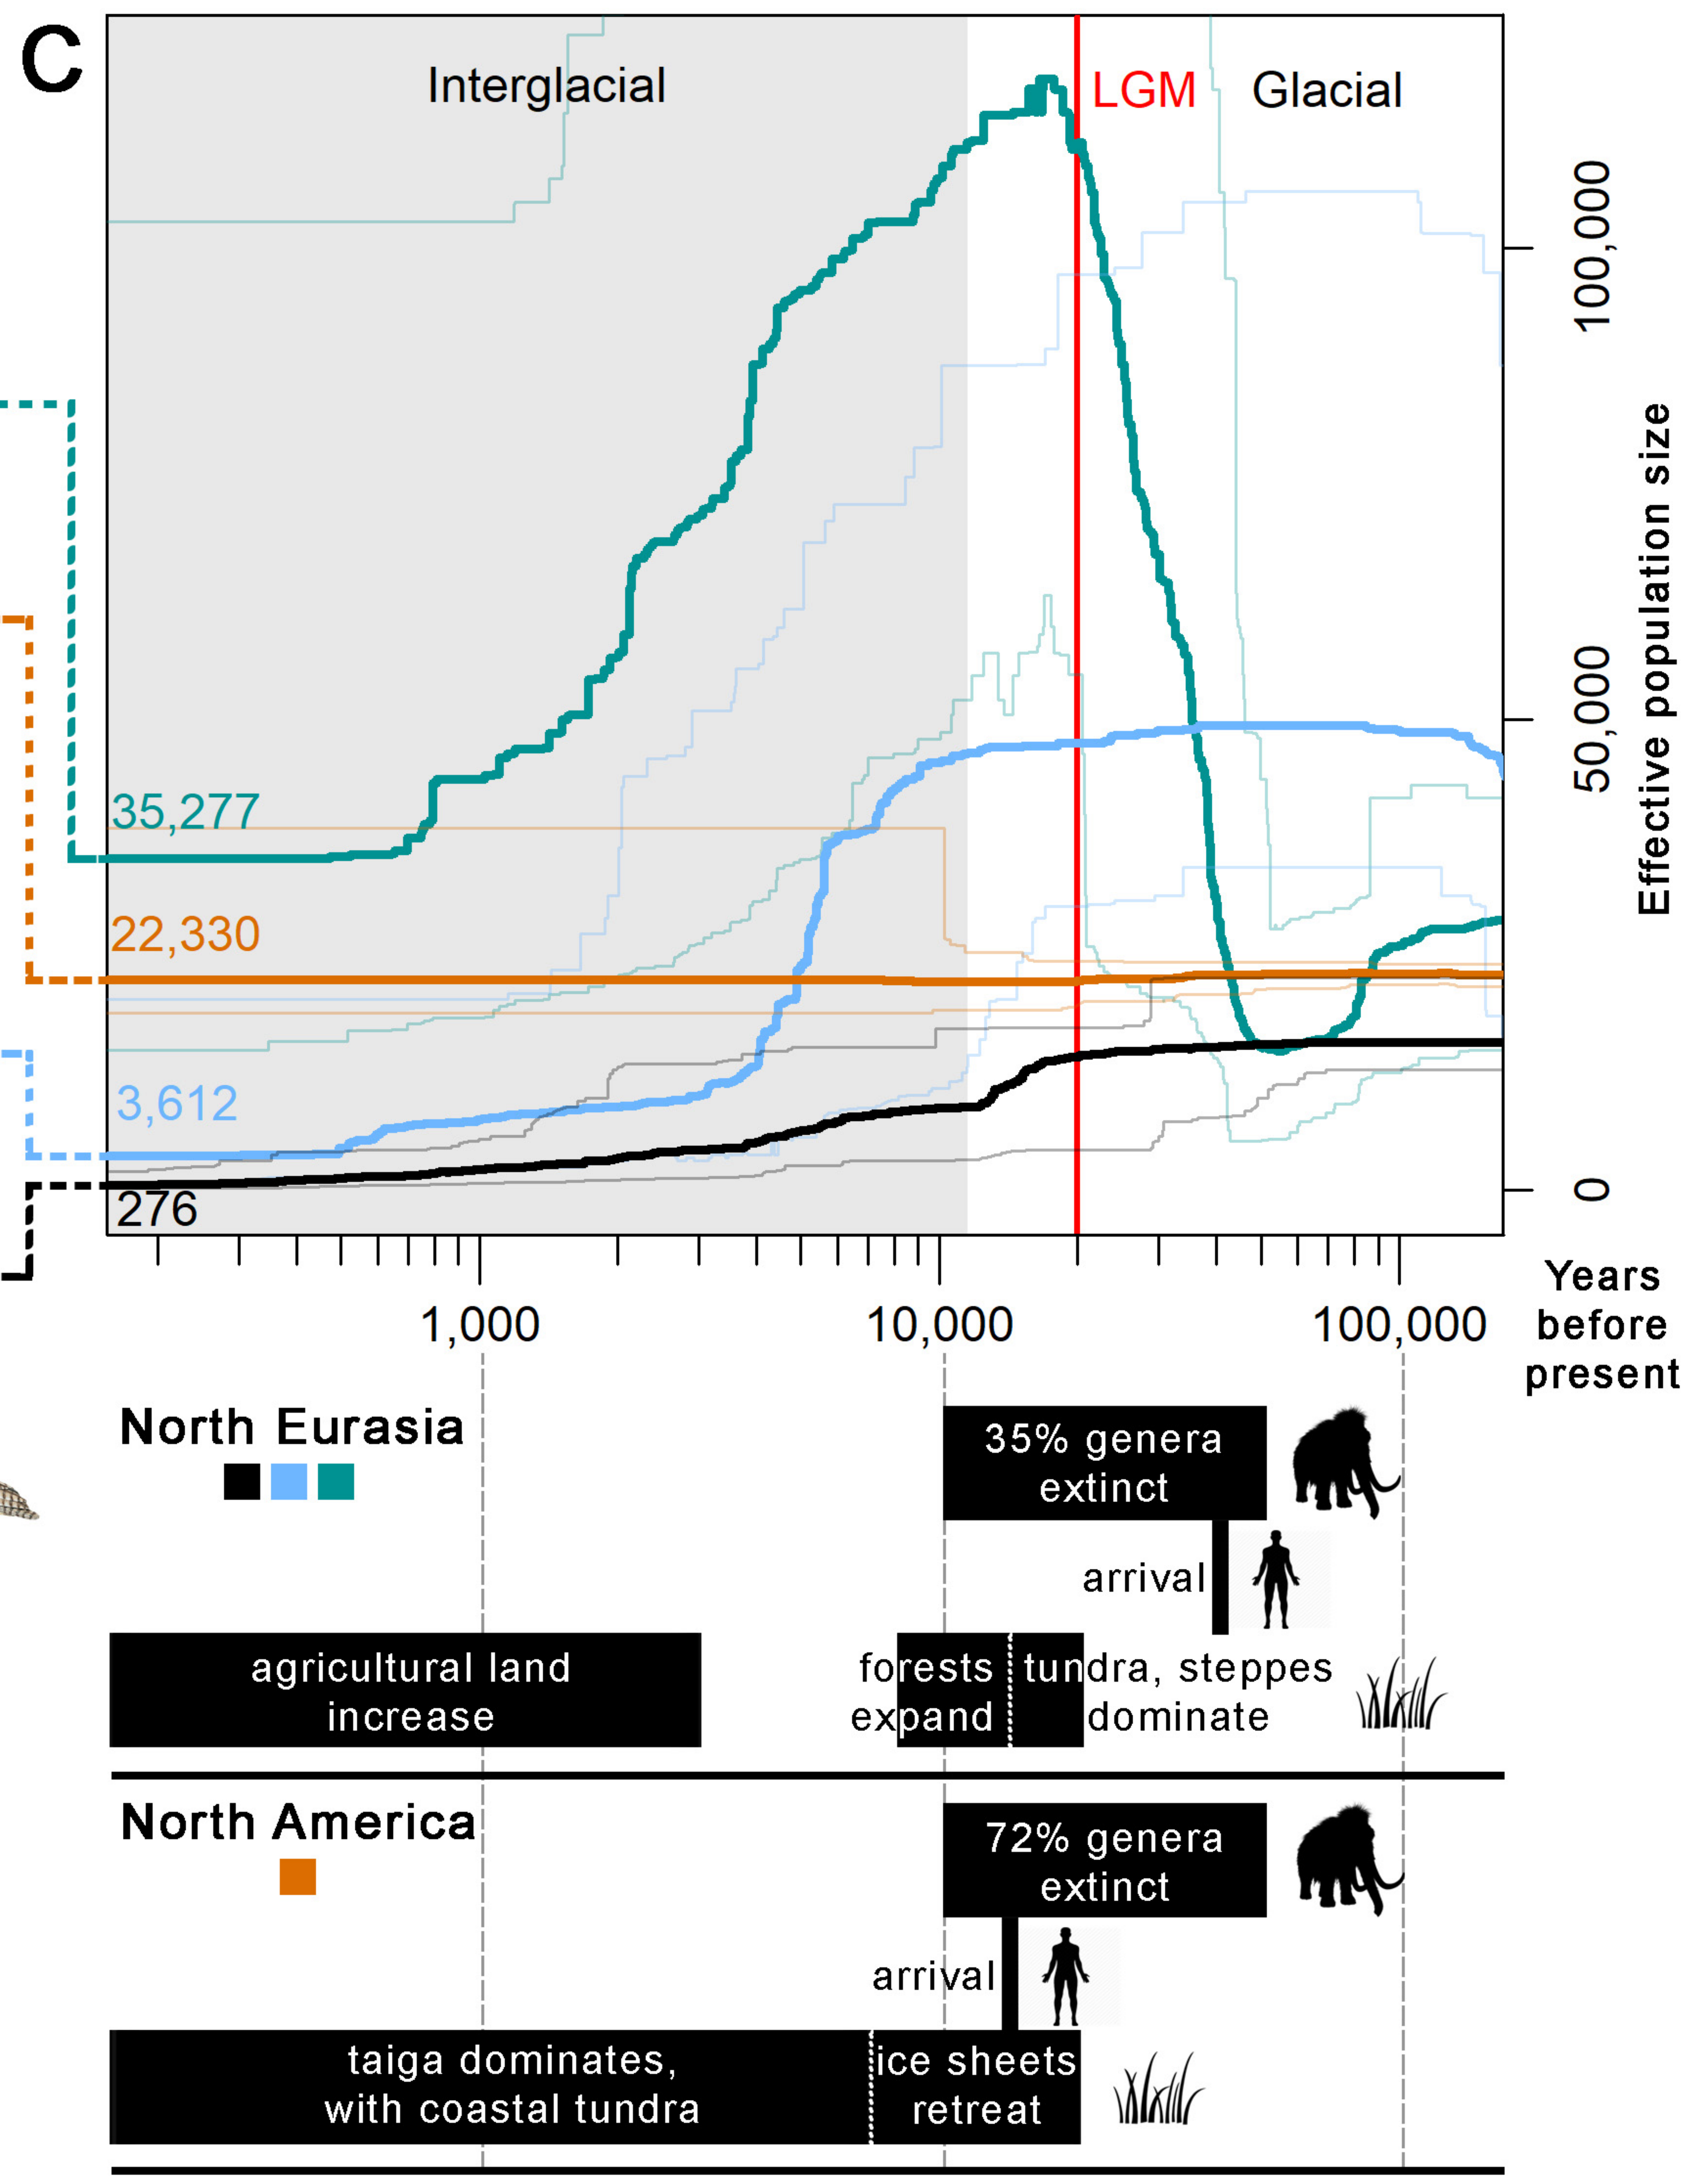

Source: https://biorxiv.org/content/10.1101/2021.07.02.450884v1.full.pdf
